# Supplementary figures and images for: Biomimetic bi-functional silicon nanospike-array structures prepared by using self-organized honeycomb templates and reactive ion etching
Source: Royal Society of Chemistry journal article supplement (doi:10.1039/c0jm02423f), 2010-01-01

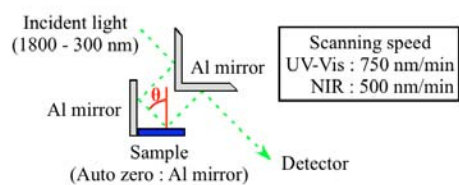

SI.1

Supplement: c0jm02423f.pdf [file c0jm02423f.pdf]
